# Supplementary material for: Insights into Dynamic Polymicrobial Synergy Revealed by Time-Coursed RNA-Seq
Source: PubMed Central journal article supplement (PMC5329018; doi:10.3389/fmicb.2017.00261), 2017-02-28
Supplement: Table4.pdf [file Table4.pdf]

|          |                                             | Pg versus time 1 minute<br>Log2 (fold change) |       |       |       |       |
|----------|---------------------------------------------|-----------------------------------------------|-------|-------|-------|-------|
| Gene     | Gene Name/ Function                         | 5                                             | 30    | 120   | 240   | 360   |
| PGN_0313 | peptide chain release factor 3              | -0.25                                         | -0.43 | -0.76 | -0.55 | -0.15 |
| PGN_0350 | probable translation initiation factor SUI1 | 1.14                                          | 1.35  | 1.64  | 1.48  | 1.21  |
| PGN_0355 | translation initiation factor IF-2          | 0.22                                          | 0.60  | 0.47  | -0.02 | -0.39 |
| PGN_0616 | probable elongation factor P                | 0.65                                          | 0.88  | 0.90  | 0.82  | 0.30  |
| PGN_0963 | translation initiation factor IF-3          | -0.37                                         | -0.57 | -0.76 | -1.20 | -1.99 |
| PGN_1014 | elongation factor G                         | 0.30                                          | 0.80  | 1.38  | 1.40  | 0.81  |
| PGN_1244 | putative peptide chain release factor RF-2  | 0.64                                          | 0.66  | 0.52  | 0.22  | -0.14 |
| PGN_1405 | elongation factor P                         | 0.70                                          | 0.94  | 0.96  | 0.75  | 0.29  |
| PGN_1578 | translation elongation factor Tu            | 1.47                                          | 1.87  | 2.11  | 1.83  | 1.09  |
| PGN_1587 | putative translation elongation factor Ts   | 0.27                                          | 0.76  | 1.27  | 1.13  | 0.60  |
| PGN_1846 | translation initiation factor IF-1          | 0.87                                          | 0.91  | 0.62  | -0.13 | -1.19 |
| PGN_1870 | translation elongation factor G             | 0.42                                          | 0.73  | 0.74  | 0.39  | 0.10  |
| PGN_2022 | peptide chain release factor 1              | -0.11                                         | 0.34  | 0.73  | 0.66  | 0.40  |

|          |                                             | PgSg versus time 1 minute<br>Log2 (fold change) |       |       |       |       |
|----------|---------------------------------------------|-------------------------------------------------|-------|-------|-------|-------|
| Gene     | Gene Name/ Function                         | 5                                               | 30    | 120   | 240   | 360   |
| PGN_0313 | peptide chain release factor 3              | -0.52                                           | -0.82 | -1.14 | -1.05 | -0.90 |
| PGN_0350 | probable translation initiation factor SUI1 | 0.85                                            | 1.13  | 1.46  | 1.56  | 1.45  |
| PGN_0355 | translation initiation factor IF-2          | -0.24                                           | -0.42 | -1.04 | -1.14 | -1.05 |
| PGN_0616 | probable elongation factor P                | 0.50                                            | 0.56  | 0.74  | 0.91  | 0.91  |
| PGN_0963 | translation initiation factor IF-3          | -0.83                                           | -0.69 | -0.86 | -1.15 | -1.42 |
| PGN_1014 | elongation factor G                         | 0.84                                            | 0.80  | 0.82  | 0.98  | 0.94  |

|          |                                            |       |       |       |       |       |
|----------|--------------------------------------------|-------|-------|-------|-------|-------|
| PGN_1244 | putative peptide chain release factor RF-2 | -0.07 | -0.10 | -0.27 | -0.41 | -0.38 |
| PGN_1405 | elongation factor P                        | 0.52  | 0.56  | 0.74  | 1.08  | 1.08  |
| PGN_1578 | translation elongation factor Tu           | 0.96  | 1.24  | 1.05  | 0.71  | 0.67  |
| PGN_1587 | putative translation elongation factor Ts  | -0.07 | 0.28  | 0.43  | 0.31  | 0.20  |
| PGN_1846 | translation initiation factor IF-1         | 1.00  | 1.39  | 1.22  | 0.68  | 0.34  |
| PGN_1870 | translation elongation factor G            | 0.05  | -0.23 | -0.69 | -0.64 | -0.29 |
| PGN_2022 | peptide chain release factor 1             | 0.10  | 0.19  | -0.46 | -0.61 | -0.66 |

|          |                                             | PgSg versus Pg<br>Log2 (fold change) |       |       |       |       |
|----------|---------------------------------------------|--------------------------------------|-------|-------|-------|-------|
| Gene     | Gene Name/ Function                         | 5                                    | 30    | 120   | 240   | 360   |
| PGN_0313 | peptide chain release factor 3              | -0.22                                | 0.43  | 1.06  | 0.48  | -0.82 |
| PGN_0350 | probable translation initiation factor SUI1 | -0.28                                | -0.19 | -0.12 | 0.09  | 0.21  |
| PGN_0355 | translation initiation factor IF-2          | -0.45                                | -0.98 | -1.48 | -1.10 | -0.66 |
| PGN_0616 | probable elongation factor P                | -0.15                                | -0.29 | -0.14 | 0.11  | 0.58  |
| PGN_0963 | translation initiation factor IF-3          | -0.57                                | -0.14 | 0.41  | 0.82  | 0.89  |
| PGN_1014 | elongation factor G                         | 0.49                                 | -0.01 | -0.52 | -0.40 | 0.13  |
| PGN_1244 | putative peptide chain release factor RF-2  | -0.67                                | -0.71 | -0.76 | -0.61 | -0.25 |
| PGN_1405 | elongation factor P                         | -0.15                                | -0.35 | -0.20 | 0.33  | 0.76  |
| PGN_1578 | translation elongation factor Tu            | -0.49                                | -0.58 | -0.99 | -1.08 | -0.42 |
| PGN_1587 | putative translation elongation factor Ts   | -0.34                                | -0.45 | -0.78 | -0.78 | -0.40 |
| PGN_1846 | translation initiation factor IF-1          | 0.18                                 | 0.54  | 0.65  | 0.72  | 1.29  |
| PGN_1870 | translation elongation factor G             | -0.32                                | -0.85 | -1.32 | -0.96 | -0.37 |
| PGN_2022 | peptide chain release factor 1              | 0.19                                 | -0.13 | -1.12 | -1.21 | -1.03 |

**Table S4 (above)** Differential expression of genes associated with translation initiation, elongation, and termination. Results are expressed as  $\log_2$  fold change for the comparisons at the times indicated in minutes. Higher mRNA levels are represented by red font, lower mRNA levels are represented by green font, statistical thresholds are given in the main text.
